# Supplementary material for: Mechanically reconfigurable multi-functional meta-optics studied at microwave frequencies
Source: Research Square preprint supplement (doi:10.21203/rs.3.rs-112064/v1), 2020-11-24
Supplement: Supplementary file 1 [file 891fa4da739e81850d7f7a7d.docx]

Supplementary Information

Mechanically reconfigurable multi-functional meta-optics studied at microwave frequencies

Conner Ballew, Gregory Roberts, Philip Camayd-Muñoz, Maximilien F. Debbas, and Andrei Faraon*

Supplementary Visualization I: **Demonstration of the auxetic transformation of 3D-printed squares.** The squares are 3D-printed simultaneously. Midway through the print, a Nylon mesh is inserted placed on the device and the 3D print is resumed. The Nylon mesh is cut, leaving only the appropriate hinges.
